# Supplementary material for: Photoresponsive, switchable, pressure-sensitive adhesives: influence of UV intensity and hydrocarbon chain length of low molecular weight azobenzene compounds
Source: Royal Society of Chemistry journal article supplement (doi:10.1039/d1ra06596c), 2021-01-01
Supplement: d1ra06596c1.pdf [file d1ra06596c1.pdf]

## **Photoresponsive, Switchable, Pressure-Sensitive Adhesives: Influence of UV Intensity and Hydrocarbon Chain Length of Low Molecular Weight Azobenzene Compounds**

Tae-Hyung Lee,<sup>a</sup> Gi-Yeon Han,<sup>a</sup> Mo-Beom Yi,<sup>a</sup> Jae-Ho Shin,<sup>a</sup> and Hyun-Joong Kim<sup>\*a,b</sup>

<sup>a</sup>Laboratory of Adhesion and Bio-Composites,  
Program in Environmental Materials Science  
Department of Agriculture, Forestry and Bioresources  
Seoul National University  
1 Gwanak-ro, Gwanak-gu, Seoul 08826, Republic of Korea

<sup>b</sup>Research Institute of Agriculture and Life Sciences,  
Seoul National University  
1 Gwanak-ro, Gwanak-gu, Seoul 08826, Republic of Korea

\* Corresponding Author

Prof. Hyun-Joong Kim

Laboratory of Adhesion & Bio-Composites

Program in Environmental Materials Science

Department of Agriculture, Forestry and Bioresources

Seoul National University, 1 Gwanak-ro, Gwanak-gu, Seoul 08826, Republic of Korea

Tel.: +82-2-880-4784; fax: +82-2-873-2318; E-mail: [hjokim@snu.ac.kr](mailto:hjokim@snu.ac.kr) ([www.adhesion.kr](http://www.adhesion.kr))

- Synthetic route for the azobenzene-containing acrylic monomer and low molecular weight

azobenzene compounds

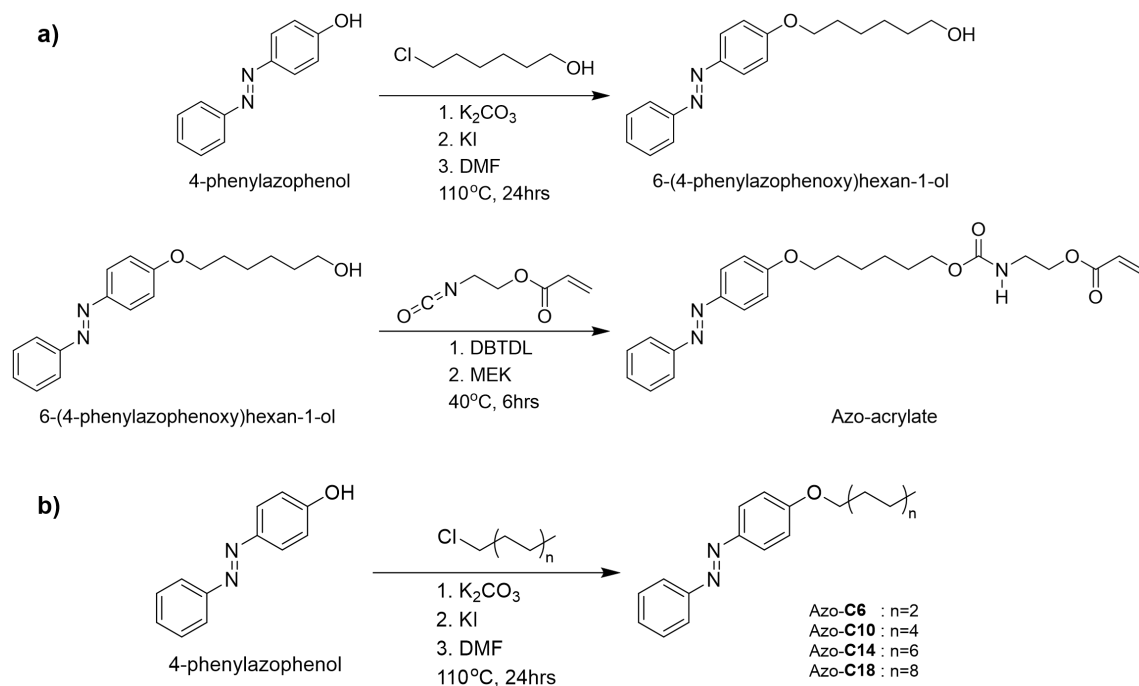

**Figure S1.** Synthetic route for a) the azobenzene-containing acrylic monomer (azo-acrylate) and b) the low molecular weight azobenzene compounds (azo-compounds).

- NMR spectra

**6-(4-(phenyldiazenyl)phenoxy)hexan-1-ol**

$^1\text{H}$  NMR (400 MHz, DMSO- $d_6$ ,  $\delta$ ): 7.83 (m, 4H, Ar H), 7.51 (m, 3H, Ar H), 7.08 (m, 2H, Ar H), 4.03 (m, 2H, OCH $_2$ ), 3.37 (m, 2H, CH $_2$ OH), 1.71 (m, 2H, OCH $_2$ CH $_2$ ), 1.38 (m, 6H, OCH $_2$ CH $_2$ CH $_2$ CH $_2$ CH $_2$ )

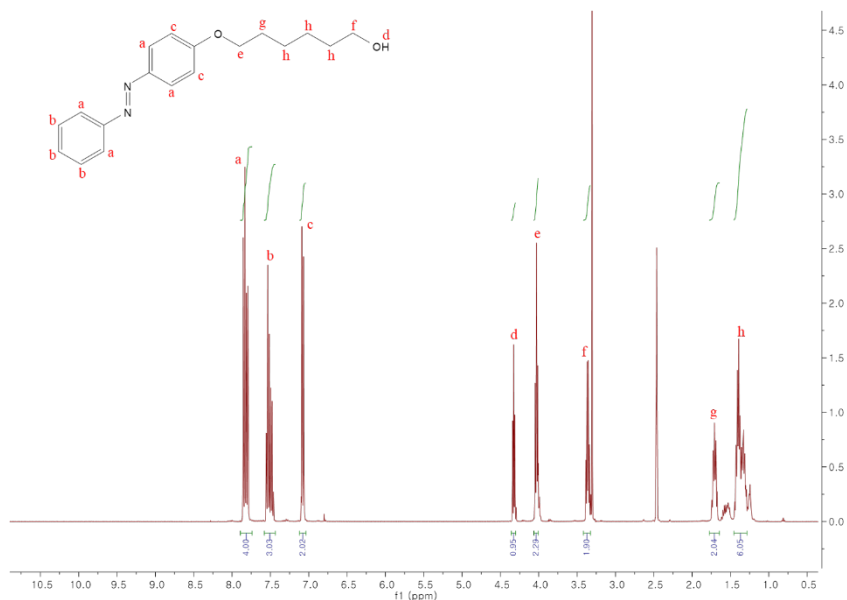

**Figure S2.**  $^1\text{H}$ -NMR spectrum of 6-(4-(phenyldiazenyl)phenoxy)hexan-1-ol

**2-(((6-(4-(phenyldiazenyl)phenoxy)hexyl)oxy)carbonyl)amino)ethyl acrylate (azo-acrylate)**

$^1\text{H}$  NMR (400 MHz, DMSO- $d_6$ ,  $\delta$ ): 7.83 (m, 4H, Ar H), 7.51 (m, 3H, Ar H), 7.23 (m, 1H, NH), 7.08 (m, 2H, Ar H), 6.31 (m, 1H, C=CH), 6.12 (m, 1H, C=CH), 5.91 (m, 1H, C=CH), 4.04 (m, 4H, Ar-OCH $_2$ , NHCH $_2$ CH $_2$ ), 3.90 (t, 2H, CH $_2$ OOCNH), 3.21 (m, 2H, NHCH $_2$ ), 1.71 (m, 2H, Ar-OCH $_2$ CH $_2$ ), 1.45 (m, 6H, Ar-OCH $_2$ CH $_2$ CH $_2$ CH $_2$ CH $_2$ )

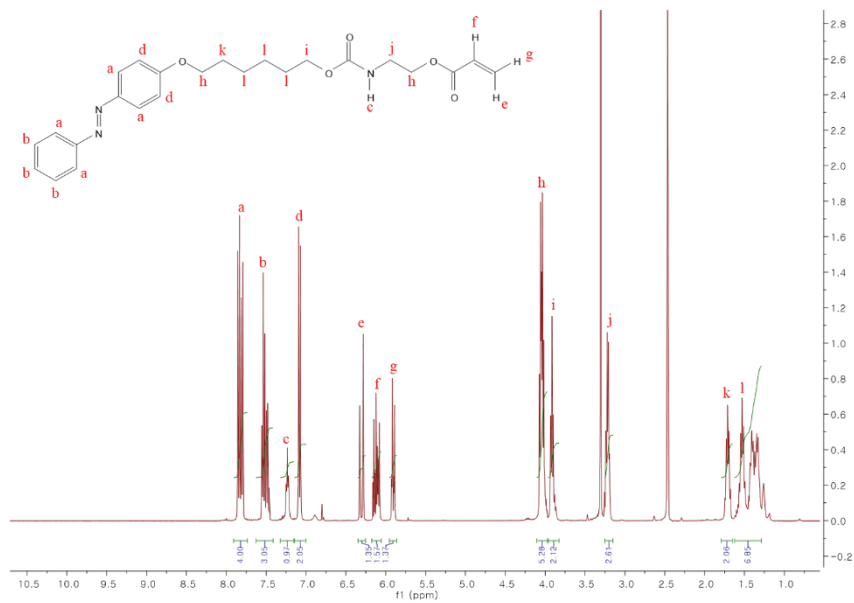

**Figure S3.**  $^1\text{H-NMR}$  spectrum of azo-acrylate

**1-(4-(hexyloxy)phenyl)-2-phenyldiazene (Azo-C6)**

$^1\text{H NMR}$  (400 MHz, DMSO- $d_6$ ,  $\delta$ ): 7.82 (m, 4H, Ar H), 7.52 (m, 3H, Ar H), 7.08 (m, 2H, Ar H), 4.02 (t, 2H,  $\text{OCH}_2$ ), 1.70 (m, 2H,  $\text{OCH}_2\text{CH}_2$ ), 1.40 (m, 2H,  $\text{OCH}_2\text{CH}_2\text{CH}_2$ ), 1.26 (m, 4H,  $\text{OCH}_2\text{CH}_2\text{CH}_2\text{CH}_2\text{CH}_2$ ), 0.84 (m, 3H,  $\text{OCH}_2\text{CH}_2\text{CH}_2\text{CH}_2\text{CH}_2\text{CH}_3$ )

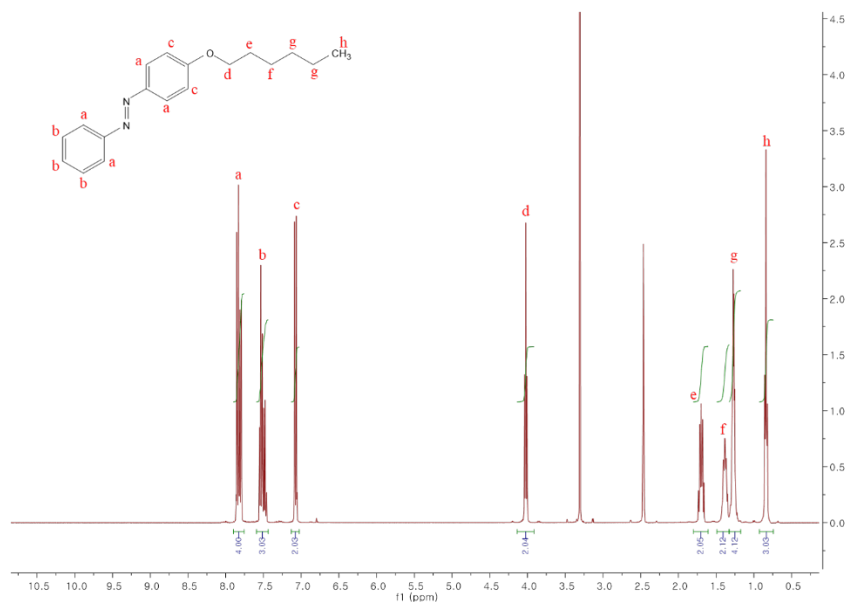

**Figure S4.**  $^1\text{H-NMR}$  spectrum of Azo-C6



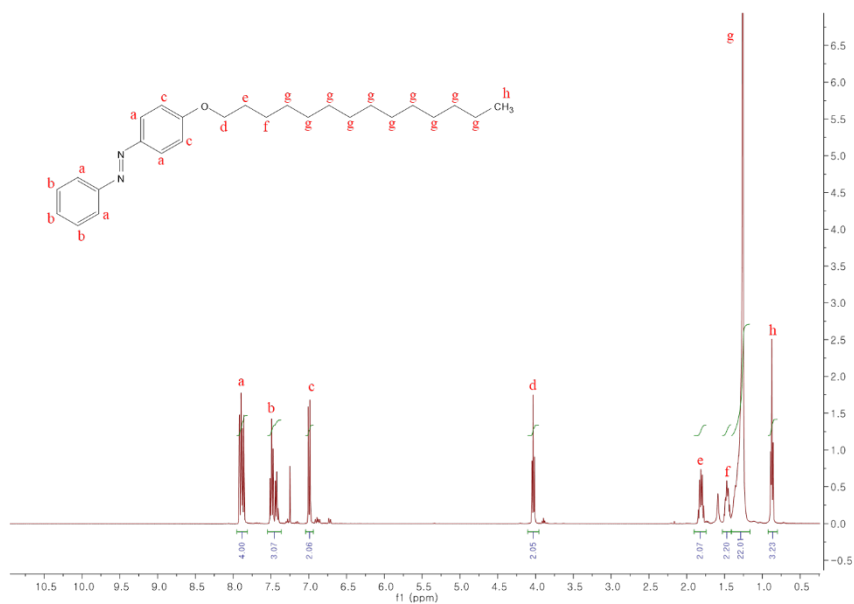

**Figure S6.**  $^1\text{H-NMR}$  spectrum of Azo-C14

#### 1-(4-(octadecyloxy)phenyl)-2-phenyldiazene (Azo-C18)

$^1\text{H NMR}$  (400 MHz, Chloroform- $d$ ,  $\delta$ ): 7.89 (m, 4H, Ar H), 7.46 (m, 3H, Ar H), 7.00 (m, 2H, Ar H), 4.03 (t, 2H,  $\text{OCH}_2$ ), 1.82 (m, 2H,  $\text{OCH}_2\text{CH}_2$ ), 1.47 (m, 2H,  $\text{OCH}_2\text{CH}_2\text{CH}_2$ ), 1.30 (m, 28H,  $\text{OCH}_2\text{CH}_2\text{CH}_2(\text{CH}_2)_{14}$ ), 0.88 (m, 3H,  $\text{OCH}_2\text{CH}_2\text{CH}_2(\text{CH}_2)_{14}\text{CH}_3$ )

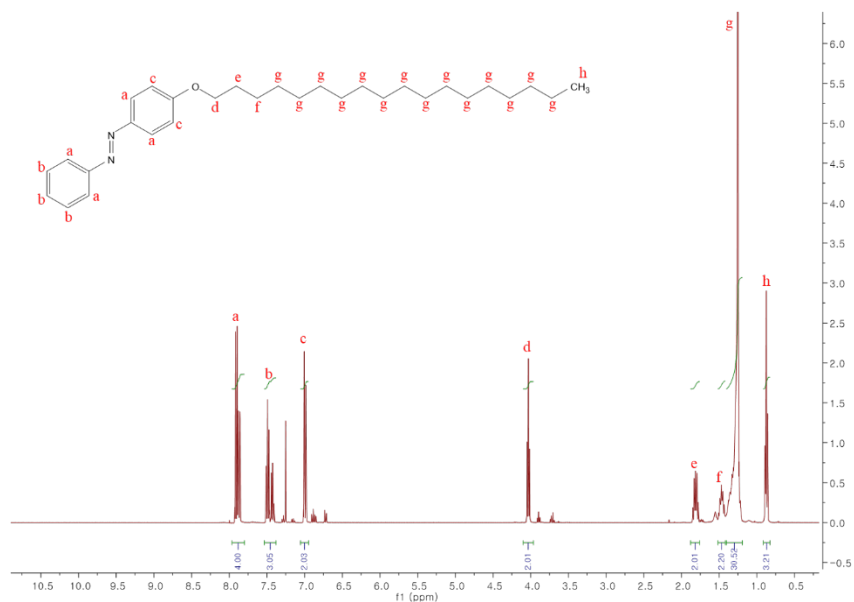

**Figure S7.**  $^1\text{H-NMR}$  spectrum of Azo-C18

Azo-polymer ( $^1\text{H}$  NMR, 400 MHz, DMSO- $d_6$ )

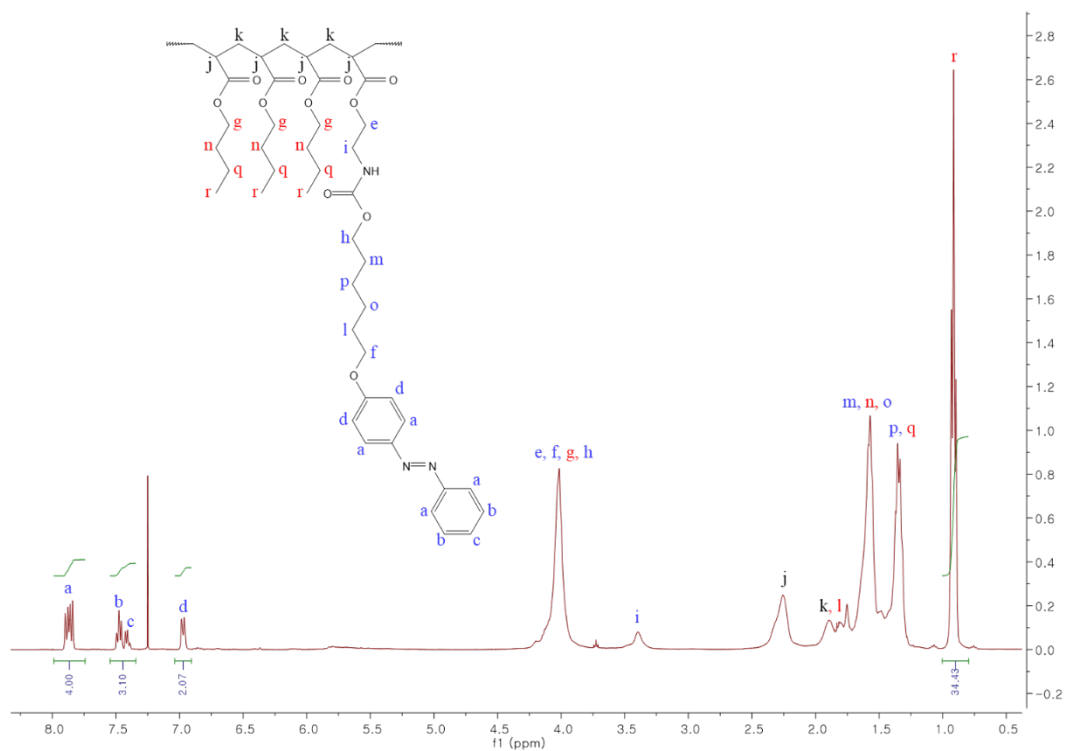

Figure S8.  $^1\text{H}$ -NMR spectrum of azo-polymer

- Probe tack

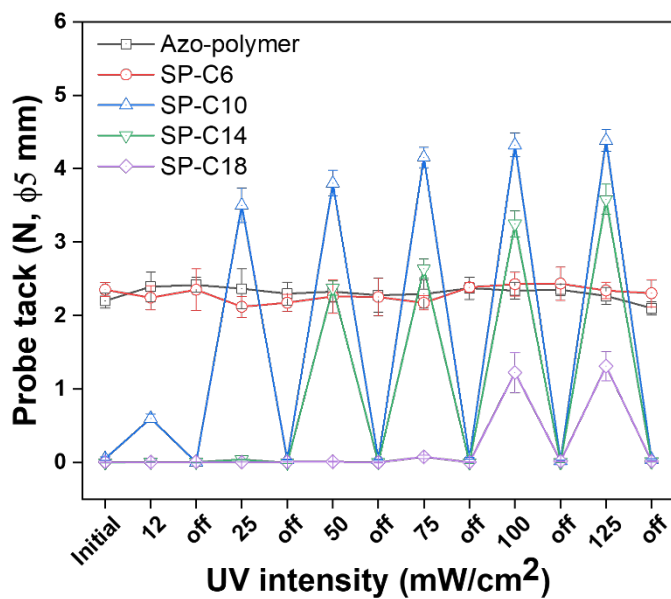

Figure S9. Probe tack forces of the switchable PSAs according to UV intensity, including switching off steps.

- Water contact angle

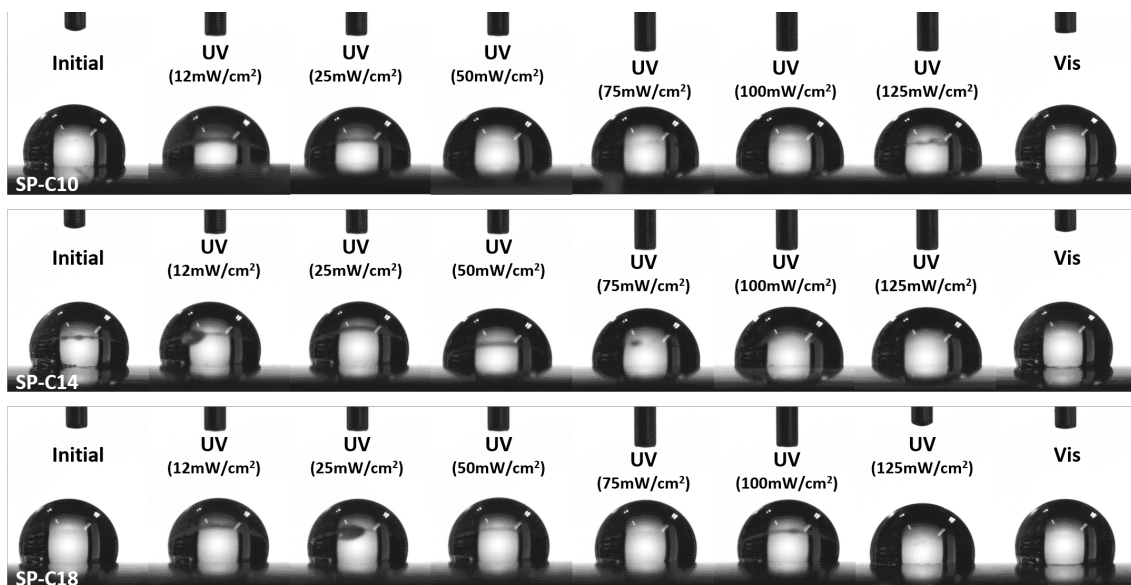

Figure S10. Images of the water droplet on the switchable PSAs according to UV intensity.
